# Supplementary material for: Artesunate Dry Emulsion Formulation Combined with Antibiotics for Treatment of Helicobacter pylori Infections: In Vitro/In Vivo Evaluation
Source: Int J Mol Sci. 2023 Jul 2;24(13):11008. doi: 10.3390/ijms241311008 (PMC10342150; doi:10.3390/ijms241311008)
Supplement: Supplementary file 1 [file ijms-24-11008-s001.zip › ijms-2408367-supplementary.pdf]

**Table-S1.** Liquid chromatographic mass spectrometric (LC/MS/MS) method summary for the quantification of Artesunate (ART) and Dihydroartemisinin (DHA) in rat plasma.

| Parameters                                                    | Method                                                   |
|---------------------------------------------------------------|----------------------------------------------------------|
| Matrix for calibration standards and quality control samples: | Rat K <sub>3</sub> -EDTA plasma                          |
| Calibration range:                                            | 1.00 – 500.00 ng/mL of ART<br>1.00 – 500.00 ng/mL of DHA |
| Lower limit of quantification (LLOQ):                         | 1.00 ng/mL                                               |
| Upper limit of quantification (ULOQ):                         | 500.00 ng/mL                                             |
| Analytical column:                                            | Poroshell 120, EC-C18, 50 x 4.6 mm, 2.7 µm (Agilent)     |
| Mobile phase A:                                               | 2 mM ammonium acetate with 0.02% acetic acid             |
| Mobile phase B:                                               | Methanol                                                 |
| Gradient elution                                              | 68.0 – 95.0% mobile phase B                              |
| Flow rate:                                                    | 1.00 mL/min                                              |
| Injection volume:                                             | 12 µL                                                    |
| Analysis time:                                                | 4.00 minutes                                             |
| Ionisation mode:                                              | Positive ion mode                                        |
| Sample volume:                                                | 25 µL                                                    |
| Sample preparation:                                           | Protein precipitation (25 fold dilution)                 |
| LC-MS/MS system:                                              | Shimadzu 20AC and API 5000                               |
| Analytes:                                                     | ART and DHA                                              |
| Internal standard:                                            | ART-d <sub>4</sub>                                       |

**Table-S2.** Precision and accuracy results for Artesunate quantification

| Intra-Assay | Analytical Run No. | Quality Control Samples<br>ng/mL |       |        | Calibration Standards<br>ng/mL |       |       |       |        |        |        |        |
|-------------|--------------------|----------------------------------|-------|--------|--------------------------------|-------|-------|-------|--------|--------|--------|--------|
|             |                    | LLOQ                             | QC A  | QC C   | Std B                          | Std C | Std D | Std E | Std F  | Std G  | Std H  | Std I  |
|             |                    | 1.00                             | 3.00  | 400.00 | 1.00                           | 2.00  | 10.00 | 50.00 | 150.00 | 250.00 | 350.00 | 500.00 |
| 1           | PV03               | 1.05                             | 2.66  | 400.49 | 0.96                           | 1.92  | 10.09 | 51.83 | 150.09 | 254.92 | 329.36 | 503.12 |
|             |                    | 0.84                             | 2.51  | 391.57 | 1.05                           | 1.98  | 10.95 | 50.95 | 151.84 | 249.39 | 309.72 | 506.96 |
|             |                    | 1.03                             | 2.82  | 378.77 |                                |       |       |       |        |        |        |        |
|             |                    | 0.97                             | 2.79  | 377.38 |                                |       |       |       |        |        |        |        |
|             | %C.V               | 9.7                              | 5.3   | 2.8    |                                |       |       |       |        |        |        |        |
|             | % Bias             | -2.8                             | -10.2 | -3.4   |                                |       |       |       |        |        |        |        |
| 2           | PV04               | 1.06                             | 2.89  | 373.11 | 1.02                           | 1.96  | 10.44 | 51.30 | 151.76 | 244.68 | 339.62 | 484.65 |
|             |                    | 0.97                             | 2.92  | 382.05 | 0.92                           | 2.22  | 10.53 | 50.30 | 149.30 | 253.92 | 334.80 | 469.47 |
|             |                    | 1.03                             | 2.91  | 362.94 |                                |       |       |       |        |        |        |        |
|             |                    | 1.16                             | 2.83  | 379.40 |                                |       |       |       |        |        |        |        |
|             | %C.V               | 7.5                              | 1.4   | 2.3    |                                |       |       |       |        |        |        |        |
|             | % Bias             | 5.5                              | -3.7  | -6.4   |                                |       |       |       |        |        |        |        |

|                                                                     |        |        |        |         |        |        |        |        |         |         |         |         |
|---------------------------------------------------------------------|--------|--------|--------|---------|--------|--------|--------|--------|---------|---------|---------|---------|
| Inter-Assay                                                         | Mean   | 1.014  | 2.791  | 380.714 | 0.988  | 2.020  | 10.503 | 51.095 | 150.748 | 250.728 | 328.375 | 491.050 |
|                                                                     | S.D    | 0.0921 | 0.1410 | 11.3458 | 0.0585 | 0.1356 | 0.3536 | 0.6417 | 1.2578  | 4.6950  | 13.1239 | 17.3731 |
|                                                                     | %C.V   | 9.1    | 5.1    | 3.0     | 5.9    | 6.7    | 3.4    | 1.3    | 0.8     | 1.9     | 4.0     | 3.5     |
|                                                                     | n      | 8      | 8      | 8       | 4      | 4      | 4      | 4      | 4       | 4       | 4       | 4       |
|                                                                     | % Bias | 1.4    | -7.0   | -4.8    | -1.3   | 1.0    | 5.0    | 2.2    | 0.5     | 0.3     | -6.2    | -1.8    |
| %C.V = Percent Coefficient of Variation<br>S.D = Standard Deviation |        |        |        |         |        |        |        |        |         |         |         |         |

| Curve Parameter Summary |         | Weighted Least Squares Regression Equation: $y = ax + b$ |          |
|-------------------------|---------|----------------------------------------------------------|----------|
| Analytical Run No.      | $r$     | $a$                                                      | $b$      |
| PV03                    | 0.9985  | 0.094                                                    | 0.00575  |
| PV04                    | 0.9986  | 0.0915                                                   | 0.0014   |
| Mean                    | 0.99855 | 0.09275                                                  | 0.003575 |

**Table-S3.** Precision and accuracy results for Dihydroartemisinin quantification

| Intra-Assay | Analytical Run No. | Quality Control Samples<br>ng/mL |      |        | Calibration Standards<br>ng/mL |       |       |       |        |        |        |        |
|-------------|--------------------|----------------------------------|------|--------|--------------------------------|-------|-------|-------|--------|--------|--------|--------|
|             |                    | LLOQ                             | QC A | QC C   | Std B                          | Std C | Std D | Std E | Std F  | Std G  | Std H  | Std I  |
|             |                    | 1.00                             | 3.00 | 400.00 | 1.00                           | 2.00  | 10.00 | 50.00 | 150.00 | 250.00 | 350.00 | 500.00 |
| 1           | PV03               | 1.05                             | 2.73 | 407.47 | 0.94                           | 1.87  | 9.77  | 49.85 | 153.66 | 254.61 | 326.69 | 503.99 |
|             |                    | 0.99                             | 2.61 | 396.18 | 1.06                           | 2.07  | 11.00 | 50.68 | 151.58 | 255.30 | 314.24 | 510.52 |
|             |                    | 1.07                             | 3.00 | 381.92 |                                |       |       |       |        |        |        |        |
|             |                    | 0.97                             | 2.95 | 382.38 |                                |       |       |       |        |        |        |        |
|             | %C.V               | 4.7                              | 6.5  | 3.1    |                                |       |       |       |        |        |        |        |
|             | % Bias             | 2.0                              | -5.9 | -2.1   |                                |       |       |       |        |        |        |        |
| 2           | PV04               | 1.13                             | 3.05 | 386.37 | 1.00                           | 2.24  | 10.82 | 52.50 | 156.96 | 247.67 | 345.95 | 488.64 |
|             |                    | 1.18                             | 3.13 | 374.50 | 0.97                           | 1.86  | 10.10 | 49.66 | 151.32 | 248.15 | 326.72 | 455.93 |
|             |                    | 0.96                             | 3.07 | 362.41 |                                |       |       |       |        |        |        |        |
|             |                    | 1.01                             | 2.91 | 375.47 |                                |       |       |       |        |        |        |        |
|             | %C.V               | 9.6                              | 3.1  | 2.6    |                                |       |       |       |        |        |        |        |
|             | % Bias             | 7.0                              | 1.3  | -6.3   |                                |       |       |       |        |        |        |        |

|                                                                     |        |        |        |         |        |        |        |        |         |         |         |         |
|---------------------------------------------------------------------|--------|--------|--------|---------|--------|--------|--------|--------|---------|---------|---------|---------|
| Inter-Assay                                                         | Mean   | 1.045  | 2.931  | 383.338 | 0.993  | 2.010  | 10.423 | 50.673 | 153.380 | 251.433 | 328.400 | 489.770 |
|                                                                     | S.D    | 0.0786 | 0.1781 | 13.8223 | 0.0512 | 0.1813 | 0.5835 | 1.2963 | 2.6063  | 4.0819  | 13.0927 | 24.3529 |
|                                                                     | %C.V   | 7.5    | 6.1    | 3.6     | 5.2    | 9.0    | 5.6    | 2.6    | 1.7     | 1.6     | 4.0     | 5.0     |
|                                                                     | n      | 8      | 8      | 8       | 4      | 4      | 4      | 4      | 4       | 4       | 4       | 4       |
|                                                                     | % Bias | 4.5    | -2.3   | -4.2    | -0.8   | 0.5    | 4.2    | 1.3    | 2.3     | 0.6     | -6.2    | -2.0    |
| %C.V = Percent Coefficient of Variation<br>S.D = Standard Deviation |        |        |        |         |        |        |        |        |         |         |         |         |

| Curve Parameter Summary |         | Weighted Least Squares Regression Equation: $y = ax + b$ |          |
|-------------------------|---------|----------------------------------------------------------|----------|
| Analytical Run No.      | $r$     | $a$                                                      | $b$      |
| PV03                    | 0.9983  | 0.0346                                                   | 0.00419  |
| PV04                    | 0.9981  | 0.0378                                                   | 0.00235  |
| Mean                    | 0.99820 | 0.03620                                                  | 0.003270 |
